# Supplementary material for: Utilization of Mental Health Services by Children Displaced by Hurricane Katrina
Source: Atypon-hosted journal article supplement (doi:10.1176/appi.ps.201700281), 2018-01-16
Supplement: appi.ps.201700281.ds001.pdf [file appi.ps.201700281.ds001.pdf]

Data Supplement for Quast et al. (10.1176/appi.ps.201700281)

| Appendix Table 1                                                                                                                                              |                     |                     |        |                           |                     |        |                |                             |                     |        |                |                     |                     |        |                |
|---------------------------------------------------------------------------------------------------------------------------------------------------------------|---------------------|---------------------|--------|---------------------------|---------------------|--------|----------------|-----------------------------|---------------------|--------|----------------|---------------------|---------------------|--------|----------------|
| Change in the proportion of children who received at least one prescription for the TexKat and control groups, blacks only.                                   |                     |                     |        |                           |                     |        |                |                             |                     |        |                |                     |                     |        |                |
| Medication class                                                                                                                                              | TexKat<br>(N=496)   |                     |        | Control groups            |                     |        |                |                             |                     |        |                |                     |                     |        |                |
|                                                                                                                                                               |                     |                     |        | LA-Disaster<br>(N=11,545) |                     |        |                | LA-Nondisaster<br>(N=6,695) |                     |        |                | TX<br>(N=12,144)    |                     |        |                |
|                                                                                                                                                               | 2005H1 <sup>a</sup> | 2006H1 <sup>b</sup> | Change | 2005H1 <sup>a</sup>       | 2006H1 <sup>b</sup> | Change | p <sup>c</sup> | 2005H1 <sup>a</sup>         | 2006H1 <sup>b</sup> | Change | p <sup>d</sup> | 2005H1 <sup>a</sup> | 2006H1 <sup>b</sup> | Change | p <sup>e</sup> |
| All                                                                                                                                                           | .563                | .361                | -.202  | .607                      | .469                | -.138  | 0.004          | .578                        | .472                | -.106  | <.001          | .659                | .593                | -.066  | <.001          |
| Stimulants                                                                                                                                                    | .411                | .276                | -.135  | .443                      | .343                | -.100  | .082           | .395                        | .320                | -.075  | .002           | .442                | .390                | -.052  | <.001          |
| Anitdepressants                                                                                                                                               | .141                | .048                | -.093  | .118                      | .083                | -.034  | <.001          | .136                        | .101                | -.035  | <.001          | .177                | .144                | -.033  | <.001          |
| Mood stabilizers                                                                                                                                              | .103                | .071                | -.032  | .076                      | .065                | -.010  | .051           | .073                        | .063                | -.010  | .046           | .150                | .140                | -.010  | .097           |
| Antipsychotics                                                                                                                                                | .073                | .034                | -.038  | .060                      | .041                | -.019  | .049           | .073                        | .058                | -.015  | .042           | .165                | .172                | .007   | .003           |
| Sedatives and hypnotics                                                                                                                                       | .044                | .030                | -.014  | .040                      | .037                | -.003  | .309           | .039                        | .036                | -.003  | .291           | .074                | .066                | -.008  | .603           |
| Anxiolytics                                                                                                                                                   | .012                | .008                | -.004  | .010                      | .010                | .000   | .504           | .012                        | .009                | -.003  | .785           | .019                | .021                | .002   | .383           |
| Miscellaneous                                                                                                                                                 | .060                | .058                | -.002  | .070                      | .060                | -.010  | .447           | .067                        | .063                | -.004  | .865           | .119                | .110                | -.008  | .614           |
| <sup>a</sup> January 2005 - June 2005.                                                                                                                        |                     |                     |        |                           |                     |        |                |                             |                     |        |                |                     |                     |        |                |
| <sup>b</sup> January 2006 - June 2006.                                                                                                                        |                     |                     |        |                           |                     |        |                |                             |                     |        |                |                     |                     |        |                |
| <sup>c</sup> p-value of a test of the equivalence of the change in proportions for the TexKat group and the LA disaster counties control group. df=12,039.    |                     |                     |        |                           |                     |        |                |                             |                     |        |                |                     |                     |        |                |
| <sup>d</sup> p-value of a test of the equivalence of the change in proportions for the TexKat group and the LA non-disaster counties control group. df=7,189. |                     |                     |        |                           |                     |        |                |                             |                     |        |                |                     |                     |        |                |
| <sup>e</sup> p-value of a test of the equivalence of the change in proportions for the TexKat group and the Texas control group. df=12,638.                   |                     |                     |        |                           |                     |        |                |                             |                     |        |                |                     |                     |        |                |

| Appendix Table 2                                                                                                                                              |                     |                     |        |                     |                     |        |                |                     |                     |        |                |                     |                     |        |                |
|---------------------------------------------------------------------------------------------------------------------------------------------------------------|---------------------|---------------------|--------|---------------------|---------------------|--------|----------------|---------------------|---------------------|--------|----------------|---------------------|---------------------|--------|----------------|
| Change in the mean days supply per child for the TexKat and control groups, blacks only.                                                                      |                     |                     |        |                     |                     |        |                |                     |                     |        |                |                     |                     |        |                |
|                                                                                                                                                               | TexKat              |                     |        | Control groups      |                     |        |                |                     |                     |        |                |                     |                     |        |                |
|                                                                                                                                                               | (N=496)             |                     |        | LA-Disaster         |                     |        |                | LA-Nondisaster      |                     |        |                | TX                  |                     |        |                |
| Medication class                                                                                                                                              | 2005H1 <sup>a</sup> | 2006H1 <sup>b</sup> | Change | 2005H1 <sup>a</sup> | 2006H1 <sup>b</sup> | Change | p <sup>c</sup> | 2005H1 <sup>a</sup> | 2006H1 <sup>b</sup> | Change | p <sup>d</sup> | 2005H1 <sup>a</sup> | 2006H1 <sup>b</sup> | Change | p <sup>e</sup> |
| All                                                                                                                                                           | 97.5                | 56.3                | -41.1  | 94.0                | 71.5                | -22.5  | <.001          | 90.8                | 74.7                | -16.1  | <.001          | 165.0               | 148.8               | -16.1  | <.001          |
| Stimulants                                                                                                                                                    | 42.1                | 25.2                | -16.9  | 46.5                | 36.1                | -10.4  | <.001          | 40.8                | 33.9                | -6.9   | <.001          | 53.2                | 47.5                | -5.7   | <.001          |
| Anitdepressants                                                                                                                                               | 14.7                | 4.7                 | -10.0  | 11.0                | 7.7                 | -3.3   | <.001          | 13.3                | 9.2                 | -4.1   | <.001          | 21.0                | 16.7                | -4.3   | .006           |
| Mood stabilizers                                                                                                                                              | 10.7                | 8.0                 | -2.7   | 7.8                 | 6.8                 | -1.0   | .181           | 8.1                 | 7.4                 | -.6    | .109           | 21.4                | 20.1                | -1.3   | .495           |
| Antipsychotics                                                                                                                                                | 9.1                 | 4.1                 | -5.0   | 6.4                 | 4.5                 | -1.9   | .008           | 7.8                 | 6.5                 | -1.2   | .006           | 23.9                | 24.0                | .1     | .032           |
| Sedatives and hypnotics                                                                                                                                       | 2.4                 | 1.7                 | -.7    | 1.7                 | 1.6                 | -.1    | .352           | 1.9                 | 1.6                 | -.2    | .417           | 6.7                 | 6.0                 | -.6    | .958           |
| Anxiolytics                                                                                                                                                   | .8                  | .8                  | .1     | .6                  | .7                  | .1     | .942           | .7                  | .5                  | -.2    | .492           | 1.6                 | 1.8                 | 0.2    | .888           |
| Miscellaneous                                                                                                                                                 | 5.7                 | 4.8                 | -0.9   | 6.7                 | 6.0                 | -0.7   | .862           | 6.9                 | 6.3                 | -.5    | .716           | 14.3                | 13.9                | -.4    | .731           |
| <sup>a</sup> January 2005 - June 2005.                                                                                                                        |                     |                     |        |                     |                     |        |                |                     |                     |        |                |                     |                     |        |                |
| <sup>b</sup> January 2006 - June 2006.                                                                                                                        |                     |                     |        |                     |                     |        |                |                     |                     |        |                |                     |                     |        |                |
| <sup>c</sup> p-value of a test of the equivalence of the change in proportions for the TexKat group and the LA disaster counties control group. df=12,039.    |                     |                     |        |                     |                     |        |                |                     |                     |        |                |                     |                     |        |                |
| <sup>d</sup> p-value of a test of the equivalence of the change in proportions for the TexKat group and the LA non-disaster counties control group. df=7,189. |                     |                     |        |                     |                     |        |                |                     |                     |        |                |                     |                     |        |                |
| <sup>e</sup> p-value of a test of the equivalence of the change in proportions for the TexKat group and the Texas control group. df=12,638.                   |                     |                     |        |                     |                     |        |                |                     |                     |        |                |                     |                     |        |                |

| Appendix Table 3                                                                                                                                              |                     |                     |        |                           |                     |        |                |                     |                             |        |                |                     |                     |        |                |
|---------------------------------------------------------------------------------------------------------------------------------------------------------------|---------------------|---------------------|--------|---------------------------|---------------------|--------|----------------|---------------------|-----------------------------|--------|----------------|---------------------|---------------------|--------|----------------|
| Change in the proportion of children who had at least one encounter for the TexKat and control groups, blacks only.                                           |                     |                     |        |                           |                     |        |                |                     |                             |        |                |                     |                     |        |                |
| Encounter type                                                                                                                                                | TexKat<br>(N=496)   |                     |        | Control groups            |                     |        |                |                     |                             |        |                |                     |                     |        |                |
|                                                                                                                                                               |                     |                     |        | LA-Disaster<br>(N=11,545) |                     |        |                |                     | LA-Nondisaster<br>(N=6,695) |        |                | TX<br>(N=12,144)    |                     |        |                |
|                                                                                                                                                               | 2005H1 <sup>a</sup> | 2006H1 <sup>b</sup> | Change | 2005H1 <sup>a</sup>       | 2006H1 <sup>b</sup> | Change | p <sup>c</sup> | 2005H1 <sup>a</sup> | 2006H1 <sup>b</sup>         | Change | p <sup>d</sup> | 2005H1 <sup>a</sup> | 2006H1 <sup>b</sup> | Change | p <sup>e</sup> |
| Psychiatric services                                                                                                                                          | .204                | .153                | -.050  | .204                      | .141                | -.063  | .482           | .273                | .193                        | -.080  | .133           | .576                | .553                | -.022  | .202           |
| Physician office                                                                                                                                              | .333                | .147                | -.185  | .351                      | .281                | -.070  | <.001          | .336                | .265                        | -.071  | <.001          | .130                | .105                | -.026  | <.001          |
| Emergency department                                                                                                                                          | .026                | .028                | .002   | .019                      | .020                | .001   | .900           | .024                | .021                        | -.003  | .598           | .022                | .021                | -.001  | .666           |
| Inpatient                                                                                                                                                     | .026                | .014                | -.010  | .018                      | .015                | -.003  | .375           | .021                | .019                        | -.001  | .332           | .027                | .026                | .000   | .345           |
| <sup>a</sup> January 2005 - June 2005.                                                                                                                        |                     |                     |        |                           |                     |        |                |                     |                             |        |                |                     |                     |        |                |
| <sup>b</sup> January 2006 - June 2006.                                                                                                                        |                     |                     |        |                           |                     |        |                |                     |                             |        |                |                     |                     |        |                |
| <sup>c</sup> p-value of a test of the equivalence of the change in proportions for the TexKat group and the LA disaster counties control group. df=12,039.    |                     |                     |        |                           |                     |        |                |                     |                             |        |                |                     |                     |        |                |
| <sup>d</sup> p-value of a test of the equivalence of the change in proportions for the TexKat group and the LA non-disaster counties control group. df=7,189. |                     |                     |        |                           |                     |        |                |                     |                             |        |                |                     |                     |        |                |
| <sup>e</sup> p-value of a test of the equivalence of the change in proportions for the TexKat group and the Texas control group. df=12,638.                   |                     |                     |        |                           |                     |        |                |                     |                             |        |                |                     |                     |        |                |

| Appendix Table 4                                                                                                                                        |                     |                     |        |                           |                     |        |                |                                               |                     |        |                |                     |                     |        |                |
|---------------------------------------------------------------------------------------------------------------------------------------------------------|---------------------|---------------------|--------|---------------------------|---------------------|--------|----------------|-----------------------------------------------|---------------------|--------|----------------|---------------------|---------------------|--------|----------------|
| Change in the mean encounters per child for the TexKat and control groups, blacks only.                                                                 |                     |                     |        |                           |                     |        |                |                                               |                     |        |                |                     |                     |        |                |
| Encounter type                                                                                                                                          | TexKat<br>(N=496)   |                     |        | LA-Disaster<br>(N=11,545) |                     |        |                | Control groups<br>LA-Nondisaster<br>(N=6,695) |                     |        |                | TX<br>(N=12,144)    |                     |        |                |
|                                                                                                                                                         | 2005H1 <sup>a</sup> | 2006H1 <sup>b</sup> | Change | 2005H1 <sup>a</sup>       | 2006H1 <sup>b</sup> | Change | p <sup>c</sup> | 2005H1 <sup>a</sup>                           | 2006H1 <sup>b</sup> | Change | p <sup>d</sup> | 2005H1 <sup>a</sup> | 2006H1 <sup>b</sup> | Change | p <sup>e</sup> |
| Psychiatric services                                                                                                                                    | .734                | .752                | .018   | 1.082                     | 1.420               | .338   | .215           | 1.163                                         | 2.983               | 1.820  | <.001          | 4.214               | 6.468               | 2.254  | <.001          |
| Physician office                                                                                                                                        | .859                | .240                | -.619  | .743                      | .574                | -.169  | <.001          | .728                                          | .570                | -.158  | <.001          | .243                | .190                | -.053  | <.001          |
| Emergency department                                                                                                                                    | .060                | .048                | -.012  | .037                      | .038                | .001   | 0.499          | .047                                          | .041                | -.006  | .768           | .031                | .029                | -.002  | .451           |
| Inpatient                                                                                                                                               | .036                | .018                | -.018  | .021                      | .019                | -.002  | .110           | .025                                          | .023                | -.003  | .155           | .035                | .035                | .000   | .199           |
| <sup>a</sup> January 2005 - June 2005.                                                                                                                  |                     |                     |        |                           |                     |        |                |                                               |                     |        |                |                     |                     |        |                |
| <sup>b</sup> January 2006 - June 2006.                                                                                                                  |                     |                     |        |                           |                     |        |                |                                               |                     |        |                |                     |                     |        |                |
| <sup>c</sup> p-value of a test of the equivalence of the change in means for the TexKat group and the LA disaster counties control group. df=12,039.    |                     |                     |        |                           |                     |        |                |                                               |                     |        |                |                     |                     |        |                |
| <sup>d</sup> p-value of a test of the equivalence of the change in means for the TexKat group and the LA non-disaster counties control group. df=7,189. |                     |                     |        |                           |                     |        |                |                                               |                     |        |                |                     |                     |        |                |
| <sup>e</sup> p-value of a test of the equivalence of the change in means for the TexKat group and the Texas control group. df=12,638.                   |                     |                     |        |                           |                     |        |                |                                               |                     |        |                |                     |                     |        |                |
